# Supplementary material
Source: HighWire-hosted journal article supplement (https://www.qdcxjkg.com/highwire/filestream/113104/field_highwire_adjunct_files/0/Online_supplement.pdf)
Supplement: Online_supplement.pdf [file Online_supplement.pdf]

## **Online supplement**

### *Food and aeroallergen sensitisation*

At 6 mths, 18.1% of the cohort was sensitised to food and 8.5% to aeroallergens. However with increasing age, these ratios changed. At 2 years 20.6% were sensitised to food and 35.7% to aeroallergens and at 5 years, 7.5% to food and 34.7% to aeroallergens. At 10 years, the outcome age of this paper, of the 44.2% who were sensitised, only 0.5% were sensitised to food allergens and these children were also aeroallergen sensitised.

### *Cohort size and followup numbers*

Although the original cohort enrolled was 263 children, for this 10 year followup study, we only invited those children who had completed the 5 year followup so that we would have available, as comprehensive a set of data as possible. The majority (38.5%) of the 65 children who withdrew between enrolment (263) and the 5 year followup (198), withdrew before completing even 12 months of the study. 45% of the remainder of the children who had withdrawn after the age of 1yr and who did not participate in the 5 yr followup had informed us that they were moving permanently interstate or overseas and thus not available for followup.

We therefore only contacted the 198 children who had completed the 5- year followup and invited them to attend the 10-year followup and reported on this response rate.
